# Supplementary material
Source: PubMed Central journal article supplement (PMC2907142)
Supplement: NIHMS216827-supplement-01.pdf [file NIHMS216827-supplement-01.pdf]

### Supporting Information

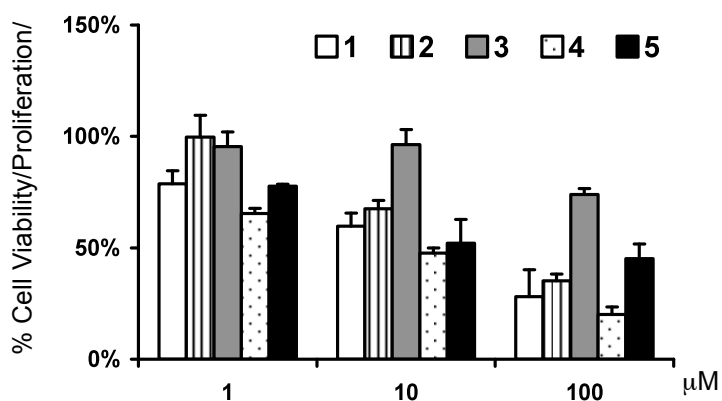

Dose-response study of compounds **1-5** on T47D cell viability and proliferation under normoxic conditions. T47D cells plated in 96-well plate (30,000 cells/well) were exposed to test compounds for 30 min, followed by another 48 h incubation under normoxic conditions (95% air: 5% CO<sub>2</sub>). Cell viability was determined using Neutral Red assay and expressed as percentage of the untreated control. Data shown are average from one experiment performed in triplicate and the bars represent standard deviation.

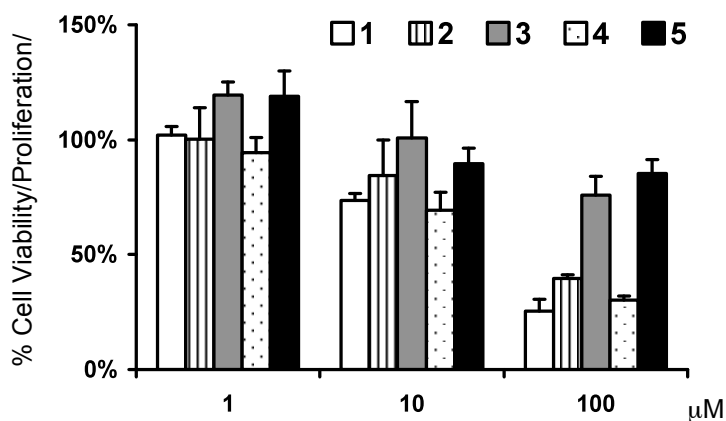

Dose-response study of compounds **1-5** on T47D cell viability and proliferation under hypoxic conditions. Cell viability determination and data presentation are the same as that described in the previous paragraph. Compound treatment was similar as that described except that the 48 h incubation was performed under hypoxic conditions (1% O<sub>2</sub>: 94% N<sub>2</sub>: 5% CO<sub>2</sub>).
